# Supplementary material for: TGF-β-Operated Growth Inhibition and Translineage Commitment into Smooth Muscle Cells of Periodontal Ligament-Derived Endothelial Progenitor Cells through Smad- and p38 MAPK-Dependent Signals
Source: PubMed Central journal article supplement — Int J Biol Sci. 2012 Aug 22;8(7):1062–74. doi: 10.7150/ijbs.4488 (PMC3432854; doi:10.7150/ijbs.4488), 2012-08-22
Supplement: ijbsv08p1062s1.pdf [file ijbsv08p1062s1.pdf]

## Supplementary Material

A

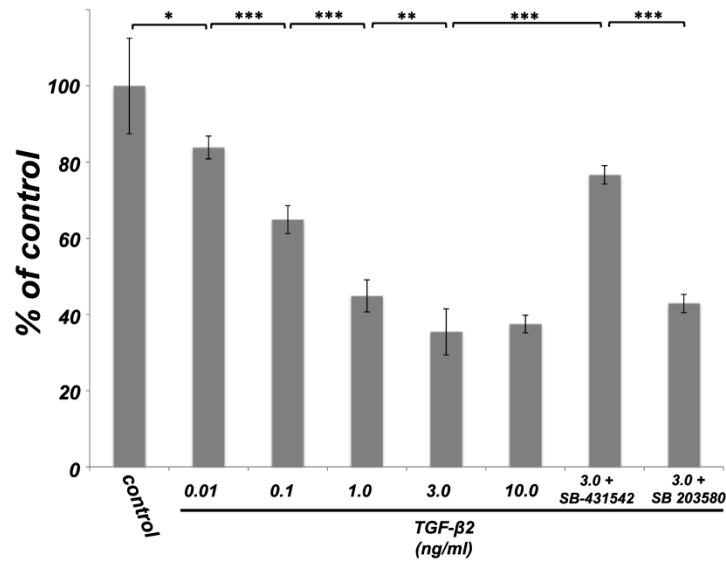

B

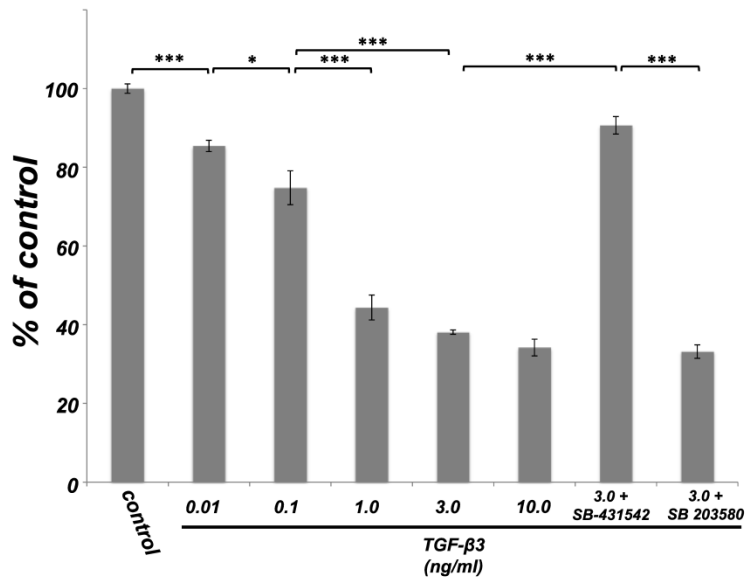

**Figure S1. TGF- $\beta$ 2 and TGF- $\beta$ 3 inhibit the growth of PDL-derived EPC-like fibroblastic cells.** SCDC2 cells were treated with TGF- $\beta$ 2 (A) or - $\beta$ 3 (B) at the indicated doses for 3 days, and cell growth was evaluated using the alamarBlue assay as described in Materials and Methods. alamarBlue working solution [10% alamarBlue (AbD Serotec, Oxon, UK) in Ham's F-12] was added to each well, and the culture was incubated at 37°C in 5% CO<sub>2</sub> for 1.5 h. Some of the wells were treated with the TGF- $\beta$  receptor inhibitor SB-431542 (10  $\mu$ M) and p38 MAPK inhibitor SB 203580 (30  $\mu$ M), which were added to the culture 30 min before the TGF- $\beta$  administration. Absorbance was measured using a microplate reader, with 570 nm and 600 nm wavelengths for reduced and oxidized forms of the reagent, respectively. The data are presented as mean  $\pm$  SD ( $n = 7$ ). \* $P < 0.05$ , \*\* $P < 0.02$ , and \*\*\* $P < 0.01$  were considered significant.

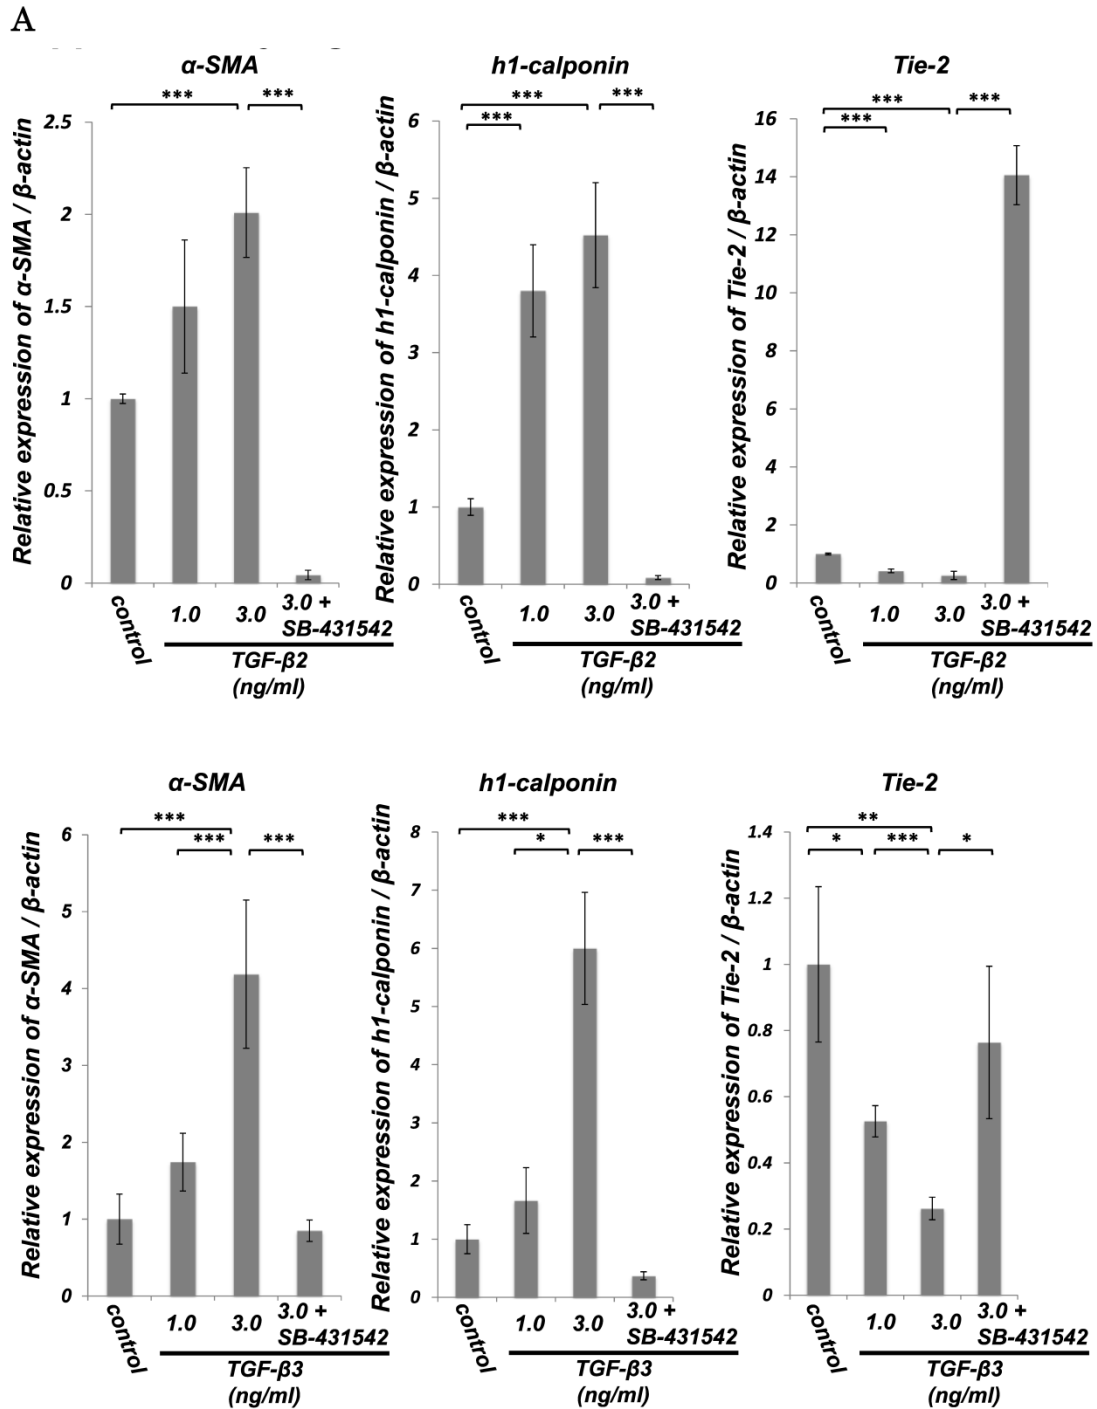

**Figure S2. TGF- $\beta$ 2 and TGF- $\beta$ 3 induce the expression of SMC markers ( $\alpha$ -SMA, h1-calponin) but suppress the expression of EC marker (Tie-2) in PDL-derived EPC-like fibroblastic cells.**

SCDC2 cells were cultured for 3 days in growth medium supplemented with 5% FBS in the presence of the indicated concentrations of TGF- $\beta$ 2 (A) or - $\beta$ 3 (B). Some of the cells were treated with the TGF- $\beta$  receptor inhibitor SB-431542 (10  $\mu$ M), which was added to the culture 30 min before the TGF- $\beta$  administration. The relative mRNA expression levels of  $\alpha$ -SMA, h1-calponin and Tie-2 in the cells were analyzed by qRT-PCR as described in Materials and Methods. Data represent the mean  $\pm$  SD ( $n = 3$ ). \* $P < 0.05$ , \*\* $P < 0.02$ , and \*\*\* $P < 0.01$  were considered significant.
